# Supplementary material for: Perinatal Western Diet Consumption Leads to Profound Plasticity and GABAergic Phenotype Changes within Hypothalamus and Reward Pathway from Birth to Sexual Maturity in Rat
Source: PubMed Central journal article supplement (PMC5581815; doi:10.3389/fendo.2017.00216), 2017-08-29
Supplement: table_1.pdf [file table_1.pdf]

**Supplementary Table 1: *TaqMan Low Density Array (TLDA) gene list***

| Gene number | Type                       | Gene Symbol    | Reference Life Technologies |               |
|-------------|----------------------------|----------------|-----------------------------|---------------|
| 1           | Cell Adhesion              | <b>Ncam1</b>   | Rn00580526 m1               |               |
| 2           |                            | <b>St8sia4</b> | Rn01427310 m1               |               |
| 3           |                            | <b>Gne</b>     | Rn00587161 m1               |               |
| 4           | Cytoskeleton               | <b>Arc</b>     | Rn00571208 g1               |               |
| 5           |                            | <b>Map2</b>    | Rn00565046 m1               |               |
| 6           |                            | <b>Gap43</b>   | Rn01474579 m1               |               |
| 7           |                            | <b>Gfap</b>    | Rn00566603 m1               |               |
| 8           | Neurogenesis               | <b>Nes</b>     | Rn00564394 m1               |               |
| 9           |                            | <b>Pcna</b>    | Rn01514538 g1               |               |
| 10          |                            | <b>Mki67</b>   | Rn01451446 m1               |               |
| 11          | Neurotrophin               | <b>Bdnf</b>    | Rn02531967 s1               |               |
| 12          |                            | <b>Ntrk2</b>   | Rn01441749 m1               |               |
| 13          |                            | <b>Cntf</b>    | Rn00755092 m1               |               |
| 14          |                            | <b>Ntf3</b>    | Rn00579280 m1               |               |
| 15          |                            | <b>Ntrk3</b>   | Rn00570389 m1               |               |
| 16          |                            | <b>ret</b>     | Rn01463098 m1               |               |
| 17          |                            | <b>Gfra1</b>   | Rn01444617 m1               |               |
| 18          |                            | <b>Gdnf</b>    | Rn00569510 m1               |               |
| 19          |                            | <b>Igf1</b>    | Rn00710306 m1               |               |
| 20          | Synaptogenesis             | <b>Snap25</b>  | Rn00578534 m1               |               |
| 21          |                            | <b>Syn1</b>    | Rn00569468 m1               |               |
| 22          |                            | <b>Syp</b>     | Rn00561986 m1               |               |
| 23          |                            | <b>Syt4</b>    | Rn01157571 m1               |               |
| 24          | Connexin                   | <b>Gja1</b>    | Rn01433957 m1               |               |
| 25          |                            | <b>Gjd2</b>    | Rn00439121 m1               |               |
| 26          | Transcription regulatory   | <b>Fos</b>     | Rn00487426 g1               |               |
| 27          |                            | <b>FosB</b>    | Rn00500401 m1               |               |
| 28          |                            | <b>Socs3</b>   | Rn00585674 s1               |               |
| 29          | Dopamine circuits / opioid | <b>Comt</b>    | Rn01404927 g1               |               |
| 30          |                            | <b>Slc6a3</b>  | Rn00562224 m1               |               |
| 31          |                            | <b>Th</b>      | Rn00562500 m1               |               |
| 32          |                            | <b>Ppp1r1b</b> | Rn01452984 m1               |               |
| 33          |                            | <b>DRD1</b>    | Rh02902958 m1               |               |
| 34          |                            | <b>Drd1a</b>   | Rn03062203 s1               |               |
| 35          |                            | <b>Drd2</b>    | Rn00561126 m1               |               |
| 36          |                            | <b>Drd3</b>    | Rn00567568 m1               |               |
| 37          |                            | <b>Drd4</b>    | Rn00564071 m1               |               |
| 38          |                            | <b>Drd5</b>    | Rn00562768 s1               |               |
| 39          |                            | <b>Oprm1</b>   | Rn01430371 m1               |               |
| 40          |                            | <b>Penk</b>    | Rn00567566 m1               |               |
| 41          |                            | GABA circuit   | <b>Slc12a5</b>              | Rn00592624 m1 |
| 42          |                            |                | <b>Slc12a2</b>              | Rn00582505 m1 |
| 43          |                            |                | <b>Gabra1</b>               | Rn00788315 m1 |
| 44          |                            |                | <b>Gabra2</b>               | Rn01413643 m1 |
| 45          | <b>Gabra3</b>              |                | Rn01294271 m1               |               |
| 46          | <b>Gabra4</b>              |                | Rn00589846 m1               |               |
| 47          | <b>Gabra5</b>              |                | Rn00568803 m1               |               |
| 48          | <b>Gabra6</b>              |                | Rn00573029 m1               |               |
| 49          | <b>Gabrb1</b>              |                | Rn00564146 m1               |               |
| 50          | <b>Gabrb2</b>              |                | Rn00564149 m1               |               |
| 51          | <b>Gabrb3</b>              |                | Rn00567029 m1               |               |
| 52          | <b>Gabrd</b>               |                | Rn01517017 g1               |               |
| 53          | <b>Gabrg1</b>              |                | Rn00589841 m1               |               |
| 54          | <b>Gabrg2</b>              |                | Rn00788325 m1               |               |
| 55          | <b>Gabrg3</b>              |                | Rn00577639 m1               |               |
| 56          | <b>Gabre</b>               |                | Rn00576522 m1               |               |
| 57          | <b>Hap1</b>                | Rn00577100 m1  |                             |               |

| Gene number | Type                        | Gene Symbol   | Reference Life Technologies |
|-------------|-----------------------------|---------------|-----------------------------|
| 58          | Hypothalamic circuit        | <b>Hcrtr1</b> | Rn00565032 m1               |
| 59          |                             | <b>Hcrtr2</b> | Rn00565155 m1               |
| 60          |                             | <b>Ghr1</b>   | Rn00572319 m1               |
| 61          |                             | <b>Ghsr</b>   | Rn00821417 m1               |
| 62          |                             | <b>Cckbr</b>  | Rn00565867 m1               |
| 63          | Homeostasis regulation      | <b>InsR</b>   | Rn00690703 m1               |
| 64          |                             | <b>LepR</b>   | Rn01433205 m1               |
| 65          |                             | <b>Npy</b>    | Rn01410145 m1               |
| 66          |                             | <b>Mc4r</b>   | Rn01491866 s1               |
| 67          |                             | <b>Pomc</b>   | Rn00595020 m1               |
| 68          | Endocannabinoid System      | <b>Cnr1</b>   | Rn02758689 s1               |
| 69          |                             | <b>Mgl1</b>   | Rn00593297 m1               |
| 70          |                             | <b>Trpv1</b>  | Rn00583117 m1               |
| 71          |                             | <b>Faah</b>   | Rn00577086 m1               |
| 72          | DNA methylation             | <b>Dnmt1</b>  | Rn00709664 m1               |
| 73          |                             | <b>Dnmt3a</b> | Rn01027162 g1               |
| 74          |                             | <b>Dnmt3b</b> | Rn01536418 g1               |
| 75          | Histone deacetylases        | <b>Sirt1</b>  | Mm00490758 m1               |
| 76          |                             | <b>Sirt2</b>  | Rn01457502 m1               |
| 77          |                             | <b>Hdac1</b>  | Rn01519309 g1               |
| 78          |                             | <b>Hdac2</b>  | Rn01193634 g1               |
| 79          |                             | <b>Hdac3</b>  | Rn00584926 m1               |
| 80          |                             | <b>Hdac4</b>  | Rn01427040 m1               |
| 81          |                             | <b>Hdac5</b>  | Rn01464245 m1               |
| 82          |                             | <b>Hdac8</b>  | Rn01419046 m1               |
| 83          | Histone acetyl Transferases | <b>Kat6a</b>  | Rn01211941 m1               |
| 84          |                             | <b>Kat5</b>   | Rn01474465 m1               |
| 85          |                             | <b>Crebbp</b> | Rn00591291 m1               |
| 86          | Serotonin                   | <b>Htr1a</b>  | Rn00561409 s1               |
| 87          |                             | <b>Htr1b</b>  | Rn01637747 s1               |
| 88          |                             | <b>Htr2a</b>  | Rn00568473 m1               |
| 89          |                             | <b>Htr2c</b>  | Rn00562748 m1               |
| 90          |                             | <b>Htr6</b>   | Rn00577615 m1               |
| 91          |                             | <b>TPH2</b>   | Rn00598017 m1               |
| 92          |                             | <b>Slc6a4</b> | Rn00564737 m1               |
| 93          | House keeping genes         | <b>Gapdh</b>  | Rn01775763 g1               |
| 94          |                             | <b>Polr2a</b> | Rn01752026 m1               |
| 95          |                             | <b>Ppia</b>   | Rn00690933 m1               |
| 96          | Life Technologies Standard  | <b>18S</b>    |                             |
