# Supplementary material for: Perinatal Western Diet Consumption Leads to Profound Plasticity and GABAergic Phenotype Changes within Hypothalamus and Reward Pathway from Birth to Sexual Maturity in Rat
Source: PubMed Central journal article supplement (PMC5581815; doi:10.3389/fendo.2017.00216), 2017-08-29
Supplement: table_2.pdf [file table_2.pdf]

**Supplementary Table 2:** Summary of published data concerning DA pathway transcripts expression.

| Strain/ Perinatal exposure                         | Postnatal exposure                                             | Dopamine pathway qPCR analysis in male offspring |     |    |    |     |     |     |    |    |     |              |     |    |    |     | Behavior | References                                                                                                                  |            |
|----------------------------------------------------|----------------------------------------------------------------|--------------------------------------------------|-----|----|----|-----|-----|-----|----|----|-----|--------------|-----|----|----|-----|----------|-----------------------------------------------------------------------------------------------------------------------------|------------|
|                                                    |                                                                | VTA                                              |     |    |    |     | Nac |     |    |    |     | Hypothalamus |     |    |    |     |          |                                                                                                                             |            |
|                                                    |                                                                | TH                                               | DAT | D1 | D2 | MOR | TH  | DAT | D1 | D2 | MOR | TH           | DAT | D1 | D2 | MOR |          |                                                                                                                             |            |
| Rat SPD (Junk food 4W before mating still weaning) | Juvenile (adolescence) P42 (3 weeks junk food challenge)       | -                                                | --  | =  | =  |     | =   | --  | =  | =  | ++  |              |     |    |    |     |          | Higher preference for fat (free choice)                                                                                     | 21         |
|                                                    | Adult P90 (junk food choice from weaning)                      | =                                                | =   | =  | =  |     | =   | ++  | =  | -  | --  |              |     |    |    |     |          | Higher preference for fat (free choice)                                                                                     |            |
| Rat SPD (Junk food 4W before mating still weaning) | Juvenile (adolescence) P42 (3 weeks junk food challenge)       | =                                                | =   | +  | =  | =   |     |     | -  | =  | =   |              |     |    |    |     |          | Higher preference for carbohydrate rather than fat (free choice)                                                            | 35         |
|                                                    | Adult P90 (Chow + 3weeks juvenile Junk food challenge)         | =                                                | =   | +  | =  | =   |     |     | =  | =  | =   |              |     |    |    |     |          | No more difference (free choice)                                                                                            |            |
|                                                    | Adult 6 months (chow + 3weeks young adult junk food challenge) | =                                                | =   | =  | -  | =   |     |     | =  | +  | =   |              |     |    |    |     |          | No more difference (free choice)                                                                                            |            |
| Rat SPD (WD from G1 to P21)                        | Childhood (P25) (chow from weaning)                            | =                                                | =   | =  | =  | =   | =   | =   | =  | ++ | =   | =            | =   | =  | =  |     |          | Higher preference for fat (free choice )                                                                                    | this study |
|                                                    | Juvenile (adolescence) P45 (chow from weaning)                 | -                                                | =   | =  | =  | =   | =   | +   | =  | =  | =   | =            | +   | =  | =  |     |          | Less preference for fat in WD group                                                                                         |            |
|                                                    | Adult P90 (chow from weaning)                                  | =                                                | =   | =  | =  | =   | -   | =   | =  | =  | +   | =            | +   | -  | =  | =   |          | No more difference                                                                                                          |            |
| Rat Wistar (WD from G1 to P21)                     | Adult P90 (chow from weaning)                                  |                                                  |     | =  | =  |     | =   | =   | =  |    |     |              |     |    |    |     |          | No difference in motivation for high sugar reward (operant) but a higher preference for high palatable pellet (runway task) | 22         |
| Mice C57BL/6 (HFD 60% 3Month before mating)        | Adult 18-24W (Chow from weaning)                               | =                                                | ++  |    |    |     | -   | ++  | -- | -- |     | ++           | --  | =  | =  |     |          | Higher preference for fat                                                                                                   | 19         |
| Rat SPD (HFD G13 to weaning)                       | Adult P90 (Chow from weaning)                                  |                                                  |     | =  | -  |     |     |     | =  | =  |     |              |     |    |    |     |          | Higher motivation for fat reward but not sugar                                                                              | 20         |
